# Supplementary material for: Mechanomimetic 3D Scaffolds as a Humanized In Vitro Model for Ovarian Cancer
Source: MDPI journal article supplement (doi:10.3390/cells11050824), 2022-02-26
Supplement: s1 [file s1]

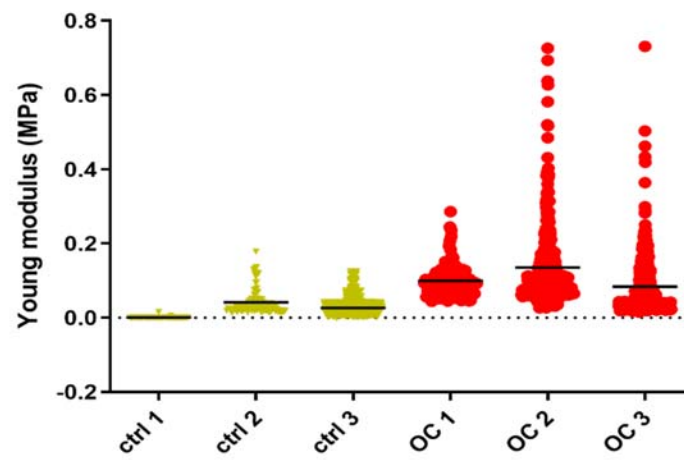

**Figure S1. AFM analysis of patients' derived biopsies.** (A) Young's modulus (MPa) analysis of 3 HGCS III (OC1-2-3) and 3 normal patient-derived biopsies (ctrl 1-2-3) by AFM.

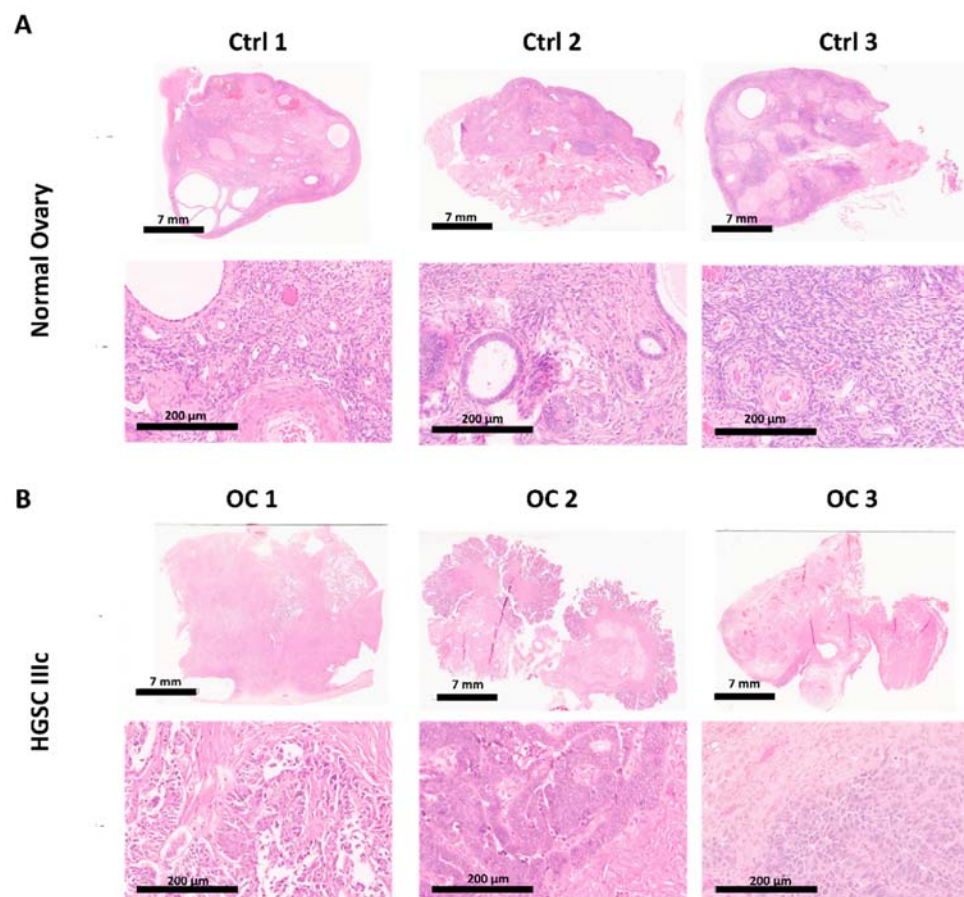

**Figure S2. H&E characterization of patients' samples.** (A) H&E staining of 3 normal ovary biopsies samples. (B) H&E staining of 3 HGSC IIIc biopsies samples. Images were acquired with 4x and 20x objective.

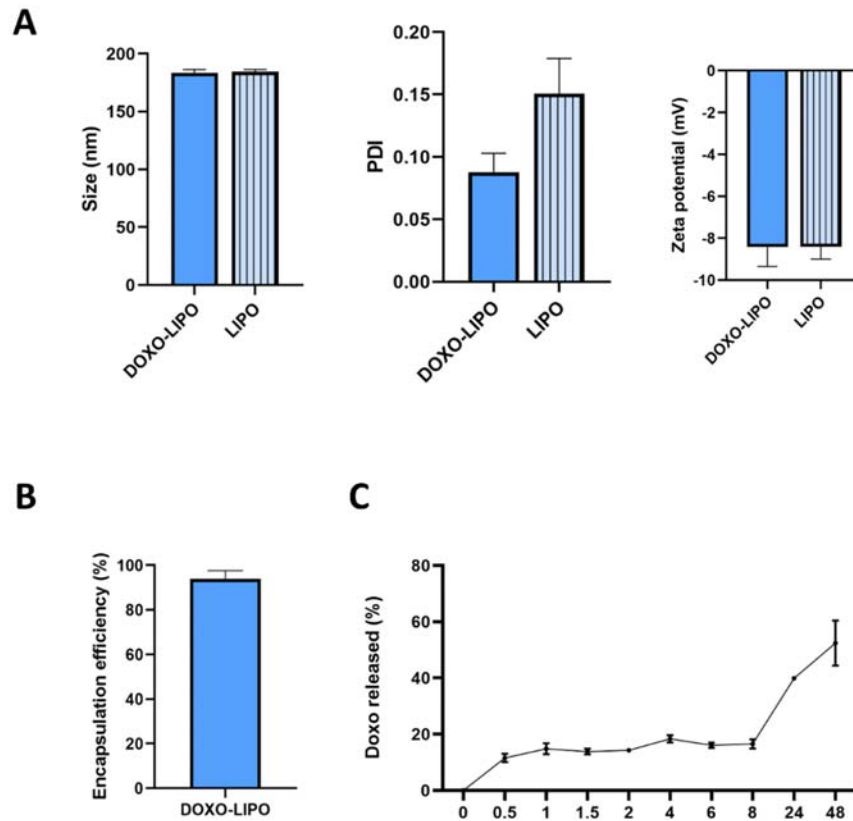

**Figure S3. Physical and pharmaceutical characterization of empty (LIPO) and doxorubicin-loaded liposomes (DOXO-LIPO).** (A) Dynamic light scattering and zeta potential measurements comparing empty LIPO and DOXO-LIPO. (B) Encapsulation efficiency and (C) release profiles of DOXO-LIPO in PBS +10% FBS (50:50) at 37 °C. Data are mean + standard deviation (n=3).

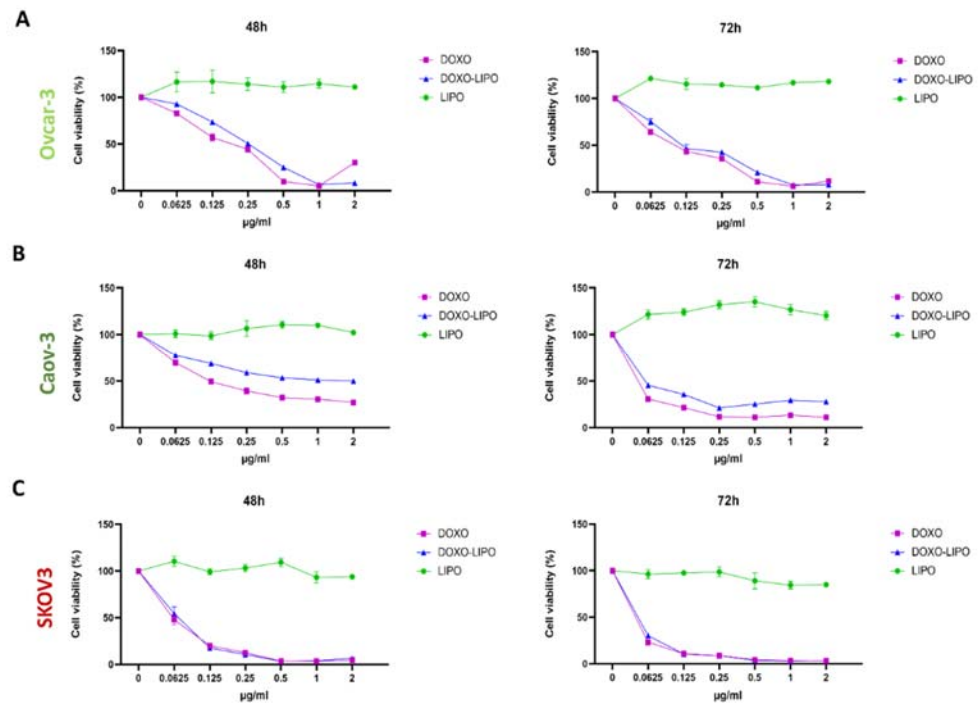

**Figure S4. DOXO free and DOXO LIPO cytotoxic effect on ovarian cancer cell lines in 2D after 48h and 72h of treatment.** MTT analysis after 48h and 72h of DOXO free and DOXO-LIPO treatment for OVCAR-3 (A), Caov-3 (B), SKOV3 (C) ovarian cancer cell lines. Data are mean + standard deviation (n=3).

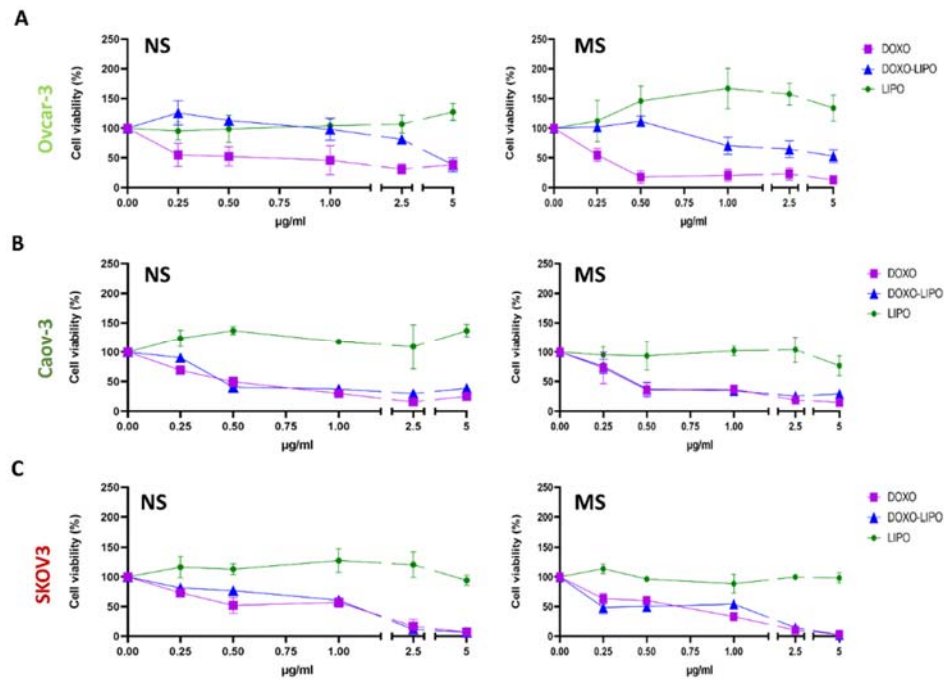

**Figure S5. DOXO free and DOXO LIPO cytotoxic effect on ovarian cancer cell lines in 3D MS and NS after 72h of treatment.** Cell TiterGlo analysis on cell viability under DOXO free, DOXO-LIPO and LIPO treatment for OVCAR-3 (A), Caov-3 (B), SKOV3 (C) ovarian cancer cell lines. Data are mean + standard deviation (n=3/5).
